# Supplementary material
Source: PubMed Central journal article supplement (PMC7722126)

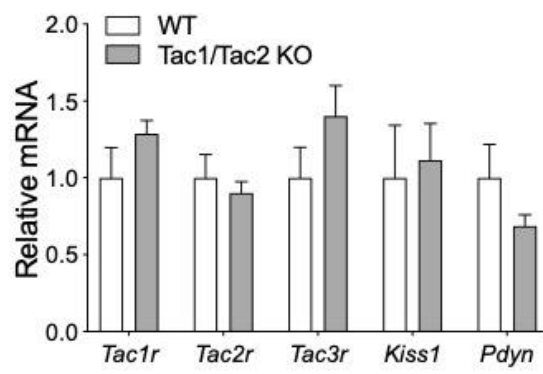

Supplemental Figure 1

Supplement: NIHMS1607852-supplement-1.pdf [file NIHMS1607852-supplement-1.pdf]
